# Supplementary material for: The impact of BMI on sperm parameters and the metabolite changes of seminal plasma concomitantly
Source: PubMed Central journal article supplement (PMC5564712; doi:10.18632/oncotarget.14950), 2017-02-01
Supplement: oncotarget-08-48619-s001.pdf [file oncotarget-08-48619-s001.pdf]

# The impact of BMI on sperm parameters and the metabolite changes of seminal plasma concomitantly

## SUPPLEMENTARY MATERIALS

**Supplementary Table 1: Characteristics of total participants and sperm parameter outcome in relation to BMI of personal study**

|                            | Samples (n) | Overall, n = 2106 | BMI 18.5-24.9, n = 1333 | BMI 25.0-29.9, n = 670 | BMI ≥30.0, n = 103     | ANOVA P-value | Regression analysis    |         |
|----------------------------|-------------|-------------------|-------------------------|------------------------|------------------------|---------------|------------------------|---------|
|                            |             |                   |                         |                        |                        |               | Regression coefficient | P-value |
| Age (y)                    | 2086        | 29.79 ± 4.15      | 29.56 ± 4.10 (n = 1318) | 30.32 ± 4.33 (n = 667) | 29.18 ± 3.34 (n = 101) | <0.001        |                        |         |
| BMI (kg/m <sup>2</sup> )   | 2106        | 24.18 ± 3.32      | 22.21 ± 1.74            | 26.84 ± 1.36           | 32.44 ± 3.14           | <0.001        |                        |         |
| Total sperm count          | 2106        | 154.58 ± 182.31   | 161.46 ± 198.13         | 142.58 ± 146.20        | 143.51 ± 177.32        | 0.075         | -0.829                 | 0.488   |
| Sperm concentration        | 2106        | 50.18 ± 43.95     | 51.08 ± 44.53           | 49.14 ± 43.38          | 45.26 ± 39.79          | 0.329         | -0.065                 | 0.821   |
| Semen volume               | 2106        | 3.10 ± 1.95       | 3.17 ± 2.17             | 2.99 ± 1.51            | 2.97 ± 1.51            | 0.133         | -0.021                 | 0.094   |
| Sperm motility             | 2106        | 47.37 ± 23.67     | 47.04 ± 24.07           | 48.52 ± 22.65          | 44.12 ± 24.62          | 0.149         | 0.117                  | 0.450   |
| Sperm progressive motility | 2106        | 38.42 ± 20.57     | 37.82 ± 20.70           | 39.89 ± 20.07          | 36.57 ± 21.71          | 0.067         | 0.193                  | 0.153   |

**Supplementary Table 2: Odds risks for semen parameter measurements below WHO reference limits in total abnormal weight men of personal study**

| Sperm parameter            | Reference limit (WHO)      | Crude odds risk (95% CI) <sup>a</sup> |                          | Adjusted odds risk (95% CI) <sup>b</sup> |                   |
|----------------------------|----------------------------|---------------------------------------|--------------------------|------------------------------------------|-------------------|
|                            |                            | overweight                            | obese                    | overweight                               | obese             |
| Total sperm count          | <39 (×10 <sup>6</sup> )    | 0.97 (0.78, 1.21)                     | <b>1.58 (1.03, 2.43)</b> | 0.99 (0.80, 1.24)                        | 1.53 (0.99, 2.36) |
| Sperm concentration        | <15 (×10 <sup>6</sup> /ml) | 0.98 (0.78, 1.22)                     | 1.24 (0.79, 1.97)        | 0.99 (0.79, 1.24)                        | 1.19 (0.75, 1.90) |
| Semen volume               | <1.5 (ml)                  | 1.18 (0.85, 1.64)                     | 1.38 (0.72, 2.67)        | 1.19 (0.86, 1.66)                        | 1.40 (0.73, 2.71) |
| Sperm motility             | <40%                       | 0.85 (0.70, 1.03)                     | 1.29 (0.86, 1.93)        | 0.82 (0.68, 1.00)                        | 1.30 (0.86, 1.95) |
| Sperm progressive motility | <32%                       | 0.84 (0.69, 1.02)                     | 1.28 (0.85, 1.91)        | 0.82 (0.68, 1.00)                        | 1.29 (0.86, 1.94) |

a. Crude odds risk of sperm parameters under WHO reference lower limits (5th percentiles).

b. Adjusted for age.

**Supplementary Table 3: Odds risks for semen parameter measurements below WHO reference limits in fertile abnormal weight men of personal study**

| Sperm parameter            | Reference (WHO)            | limit | Crude odds risk (95% CI) <sup>a</sup> |                   | Adjusted odds risk (95% CI) <sup>b</sup> |                   |
|----------------------------|----------------------------|-------|---------------------------------------|-------------------|------------------------------------------|-------------------|
|                            |                            |       | overweight                            | obese             | overweight                               | obese             |
| Total sperm count          | <39 (×10 <sup>6</sup> )    |       | 1.29 (0.78, 2.14)                     | 1.03 (0.38, 2.77) | 1.32 (0.80, 2.19)                        | 0.95 (0.35, 2.57) |
| Sperm concentration        | <15 (×10 <sup>6</sup> /ml) |       | 1.73 (0.90, 3.33)                     | 1.28 (0.36, 4.56) | 1.77 (0.92, 3.42)                        | 1.22 (0.34, 4.36) |
| Semen volume               | <1.5 (ml)                  |       | 1.09 (0.68, 1.76)                     | 0.81 (0.31, 2.17) | 1.12 (0.69, 1.81)                        | 0.74 (0.28, 1.98) |
| Sperm motility             | <40%                       |       | 1.08 (0.74, 1.58)                     | 0.88 (0.42, 1.85) | 1.07 (0.73, 1.57)                        | 1.01 (0.47, 2.14) |
| Sperm progressive motility | <32%                       |       | 0.99 (0.68, 1.43)                     | 1.12 (0.56, 2.21) | 0.98 (0.67, 1.42)                        | 1.25 (0.62, 2.50) |

a. Crude odds risk of sperm parameters under WHO reference lower limits (5th percentiles).

b. Adjusted for age.

**Supplementary Table 4: Odds risks for semen parameter measurements below WHO reference limits in infertile abnormal weight men of personal study**

| Sperm parameter            | Reference limit (WHO)    | Crude odds risk (95% CI) <sup>a</sup> |                          | Adjusted odds risk (95% CI) <sup>b</sup> |                          |
|----------------------------|--------------------------|---------------------------------------|--------------------------|------------------------------------------|--------------------------|
|                            |                          | overweight                            | obese                    | overweight                               | obese                    |
| Total sperm count          | <39 ( $\times 10^6$ )    | 1.08 (0.84, 1.39)                     | <b>2.72 (1.58, 4.68)</b> | 1.08 (0.84, 1.39)                        | <b>2.69 (1.55, 4.67)</b> |
| Sperm concentration        | <15 ( $\times 10^6$ /ml) | 1.12 (0.87, 1.44)                     | <b>1.93 (1.12, 3.33)</b> | 1.11 (0.86, 1.43)                        | <b>1.87 (1.07, 3.27)</b> |
| Semen volume               | <1.5 (ml)                | 1.01 (0.63, 1.61)                     | 1.78 (0.73, 4.30)        | 0.98 (0.61, 1.59)                        | 1.86 (0.76, 4.50)        |
| Sperm motility             | <40%                     | 0.90 (0.72, 1.14)                     | <b>2.40 (1.36, 4.23)</b> | 0.88 (0.69, 1.11)                        | <b>2.47 (1.38, 4.41)</b> |
| Sperm progressive motility | <32%                     | 0.92 (0.73, 1.16)                     | <b>1.98 (1.14, 3.45)</b> | 0.90 (0.71, 1.13)                        | <b>2.03 (1.15, 3.59)</b> |

a. Crude odds risk of sperm parameters under WHO reference lower limits (5th percentiles).

b. Adjusted for age.
